# Supplementary material
Source: Elsevier journal article supplement (https://www.sciencedirect.com/science/article/pii/S0212656717304997)
Supplement: mmc1 [file S0212656717304997:mmc1.docx]

**ANEXO**

**CUESTIONARIO ADMINISTRADO A LAS EMBARAZADAS PRIMERIZAS**

Fecha: ____________

Complete y marque con un círculo la respuesta que considere adecuada.

Nombre y apellidos: _________________________ Fecha de nacimiento __________

Teléfono y/o email de contacto: ___________________________________________

Fecha probable de parto (FPP) ________ Nacionalidad 1. Española 2. Otras

Embarazo planificado / deseado 1. Sí 2. No Abortos previos: 1. Sí 2. no

Fumadora habitual 1. Sí 2. No. Fumadora durante el embarazo 1. Sí 2. no

Nivel de estudios: 1. Primarios

2. Secundarios

3. Universitarios

Ocupación: 1. Estudiante

2. Ama de casa

3. Activo autónomo

4. Activo por cuenta ajena

5. Baja laboral

6. Paro

¿Usted recibió lactancia materna (LM) al nacimiento? 1. Sí 2. No 3. No sabe

Tipo de lactancia que planea dar inicialmente: 1. Natural 2. Artificial 3. Mixta 4. No sabe

Marque las 3 fuentes de información principales acerca del embarazo y cuidado del niño:

1. Familiares

2. Amigos

3. Internet

4. Libros

5. Revistas

6. Matrona

7. Ginecóloga

8. Médico de cabecera

9. Pediatra

**Detrás de cada frase, marque el número que mejor refleje su situación actual.**

**0. Nada 1. Algo 2. Bastante 3. Mucho**

Me siento calmada 0. 1. 2. 3.

Me siento segura 0. 1. 2. 3.

Estoy tensa 0. 1. 2. 3.

Estoy contrariada 0. 1. 2. 3.

Me siento cómoda (estoy a gusto) 0. 1. 2. 3.

Me siento alterada 0. 1. 2. 3.

Estoy preocupada ahora por posibles desagracias futuras 0. 1. 2. 3.

Me siento descansada 0. 1. 2. 3.

Me siento angustiada 0. 1. 2. 3.

Me siento confortable 0. 1. 2. 3.

Tengo confianza en mí misma 0. 1. 2. 3.

Me siento nerviosa 0. 1. 2. 3.

Estoy desasosegada 0. 1. 2. 3.

Me siento muy “atada” (como oprimida) 0. 1. 2. 3.

Estoy relajada 0. 1. 2. 3.

Me siento satisfecha 0. 1. 2. 3.

Estoy preocupada 0. 1. 2. 3.

Me siento aturdida y sobreexcitada 0. 1. 2. 3.

Me siento alegre 0. 1. 2. 3.

En este momento me siento bien 0. 1. 2. 3.

**Acerca del cuidado del recién nacido, marque la respuesta que considere más adecuada**.

1. ¿Cuándo debe el recién nacido iniciar la lactancia materna?

1. Inmediatamente

2. A las 3-6 h de vida

3. A las 12 h de vida

2. ¿Cada cuántas horas debe alimentarse el recién nacido durante las primeras semanas?

1. Cada hora, incluida la noche

2. Cada 2-3 horas rigurosamente

3. Cuando el niño lo solicite con un mínimo de 6 tomas al día.

3. ¿Hasta qué edad se recomienda que un bebé sea alimentado sólo con leche de su madre?

1. 4 meses

2. 6 meses

3. 1 año

4. ¿Qué número de cacas considera que es normal en un recién nacido?

1. Que haga caca una vez al día o cada dos días

2. Que haga caca de 3 a 5 veces al día

3. Ambas son correctas

5. ¿Cuál suele ser el aspecto normal de las cacas de un niño alimentado exclusivamente al pecho?

1. Pueden ser semilíquidas, pastosas o con grumos, de color amarillo-verdoso claro (color “pistacho”)

2. Las primeras cacas tras el nacimiento pueden ser oscuras y pegajosas

3. Ambas son correctas

6. ¿Cuál es la posición ideal del recién nacido para dormir?

1. Boca arriba sin almohada

2. Boca abajo o del lado derecho sin almohada

3. Boca abajo o del lado izquierdo con almohada

7. El agua para bañar al recién nacido debe estar:

1. Cercana a la temperatura del cuerpo, rondando los 37º

2. Fría para que el niño no se queme

3. Caliente para que el niño no coja frío

8. ¿Cuántos son los controles de salud establecidos con el pediatra en el primer mes de vida?

1. 1 control

2. 2 controles

3. Ninguno si es un niño sano

9. ¿Qué temperatura, tomada en la axila, se considera fiebre?

1. Desde 36,5º

2. Desde 37,5º

3. Desde 38º

10. ¿Cuáles son las causas más frecuentes de fiebre en el niño menor de un año?

1. Las infecciones respiratorias leves

2. Las infecciones graves que precisan ingreso hospitalario

3. La salida de los dientes

11. ¿Considera necesario consultar si su bebé llora mucho?

1. Sólo si se acompaña de otro signo de enfermedad que me alarme

2. Sí, siempre se ha de consultar

3. Sí, llorar mucho podría darle un problema respiratorio

12. Cree que los cólicos del lactante son:

1. Lo sufren algunos niños y no precisa tratamiento ni es grave

2. Una enfermedad urgente

3. Una enfermedad que siempre necesita tratamiento

13. La forma de transportar a un recién nacido en el coche es:

1.En un capazo o silla homologada, adaptada a su edad y tamaño, sujeta con cinturón.

2. En brazos de la madre

3. El recién nacido no debe ir en coche.

**Indique si estas afirmaciones le parecen verdaderas o falsas**

14. Los niños recién nacidos pueden tener los pechos abultados por las hormonas que le pasa la madre. V / F

15. Las niñas recién nacidas pueden tener una pequeña menstruación al inicio de la vida. V/F

16. En los primeros días tras el nacimiento si el bebé pierde algo de peso es que está enfermo. V/F

17. Las vacunas aportan más riesgos que beneficios. V/F

18. Además de la lactancia materna, los bebés deben recibir agua. V/F

19. Todas las leches de biberón son iguales V/F

20. Tiene riesgo de enfermar el recién nacido si se pone en contacto con personas enfermas y no está vacunado V/F

21. Para el bebé recién nacido es buena la exposición directa al sol. V/F

22. La leche materna es igual que la leche de biberón V/F

23. Se puede estimular el desarrollo con caricias o masajes desde que nace V/F
